# Supplementary material
Source: publisher figshare collection journal article supplement (https://acs.figshare.com/ndownloader/files/9158845)
Supplement: Supplementary file 1 [file 9158845]

 
data_1 
 
_audit_creation_method            SHELXL-97 
_chemical_name_systematic 
; 
 ? 
; 
_chemical_name_common             ? 
_chemical_melting_point           ? 
_chemical_formula_moiety          ? 
_chemical_formula_sum 
 'C31 H30 N2 O2 S' 
_chemical_formula_weight          494.63 
 
loop_ 
 _atom_type_symbol 
 _atom_type_description 
 _atom_type_scat_dispersion_real 
 _atom_type_scat_dispersion_imag 
 _atom_type_scat_source 
 'C'  'C'   0.0033   0.0016 
 'International Tables Vol C Tables 4.2.6.8 and 6.1.1.4' 
 'H'  'H'   0.0000   0.0000 
 'International Tables Vol C Tables 4.2.6.8 and 6.1.1.4' 
 'N'  'N'   0.0061   0.0033 
 'International Tables Vol C Tables 4.2.6.8 and 6.1.1.4' 
 'O'  'O'   0.0106   0.0060 
 'International Tables Vol C Tables 4.2.6.8 and 6.1.1.4' 
 'S'  'S'   0.1246   0.1234 
 'International Tables Vol C Tables 4.2.6.8 and 6.1.1.4' 
 
_symmetry_cell_setting            Triclinic 
_symmetry_space_group_name_H-M    P-1 
 
loop_ 
 _symmetry_equiv_pos_as_xyz 
 'x, y, z' 
 '-x, -y, -z' 
 
_cell_length_a                    9.4795(10) 
_cell_length_b                    11.0883(12) 
_cell_length_c                    13.0819(14) 
_cell_angle_alpha                 91.695(2) 
_cell_angle_beta                  97.717(2) 
_cell_angle_gamma                 104.408(2) 
_cell_volume                      1316.9(2) 
_cell_formula_units_Z             2 
_cell_measurement_temperature     296(2) 
_cell_measurement_reflns_used     3237 
_cell_measurement_theta_min       2.39 
_cell_measurement_theta_max       29.50 
 
_exptl_crystal_description        block 
_exptl_crystal_colour             colorless 
_exptl_crystal_size_max           0.30 
_exptl_crystal_size_mid           0.28 
_exptl_crystal_size_min           0.20 
_exptl_crystal_density_meas       ? 
_exptl_crystal_density_diffrn     1.247 
_exptl_crystal_density_method     'not measured' 
_exptl_crystal_F_000              524 
_exptl_absorpt_coefficient_mu     0.154 
_exptl_absorpt_correction_type    Multi-scan 
_exptl_absorpt_correction_T_min   0.9554 
_exptl_absorpt_correction_T_max   0.9699 
_exptl_absorpt_process_details    SADABS 
 
_exptl_special_details 
; 
 ? 
; 
 
_diffrn_ambient_temperature       296(2) 
_diffrn_radiation_wavelength      0.71073 
_diffrn_radiation_type            MoK\a 
_diffrn_radiation_source          'fine-focus sealed tube' 
_diffrn_radiation_monochromator   graphite 
_diffrn_measurement_device_type   'Bruker APEX II area detector' 
_diffrn_measurement_method        '\w scans'  
_diffrn_detector_area_resol_mean  ? 
_diffrn_reflns_number             6725 
_diffrn_reflns_av_R_equivalents   0.0249 
_diffrn_reflns_av_sigmaI/netI     0.0404 
_diffrn_reflns_limit_h_min        -11 
_diffrn_reflns_limit_h_max        8 
_diffrn_reflns_limit_k_min        -13 
_diffrn_reflns_limit_k_max        12 
_diffrn_reflns_limit_l_min        -15 
_diffrn_reflns_limit_l_max        13 
_diffrn_reflns_theta_min          1.57 
_diffrn_reflns_theta_max          25.00 
_reflns_number_total              4596 
_reflns_number_gt                 3755 
_reflns_threshold_expression      >2sigma(I) 
 
_computing_data_collection        'Bruker SMART APEX II' 
_computing_cell_refinement        'Bruker SMART'
_computing_data_reduction         'Bruker SMART''
_computing_structure_solution     'SHELXS-97 (Sheldrick, 2008)' 
_computing_structure_refinement   'SHELXL-97 (Sheldrick, 2008)' 
_computing_molecular_graphics     'Bruker SHELXTL' 
_computing_publication_material   'Bruker SHELXTL' 
 
_refine_special_details 
; 
 Refinement of F^2^ against ALL reflections.  The weighted R-factor wR and 
 goodness of fit S are based on F^2^, conventional R-factors R are based 
 on F, with F set to zero for negative F^2^. The threshold expression of 
 F^2^ > 2sigma(F^2^) is used only for calculating R-factors(gt) etc. and is 
 not relevant to the choice of reflections for refinement.  R-factors based 
 on F^2^ are statistically about twice as large as those based on F, and R- 
 factors based on ALL data will be even larger. 
; 
 
_refine_ls_structure_factor_coef  Fsqd  
_refine_ls_matrix_type            full 
_refine_ls_weighting_scheme       calc  
_refine_ls_weighting_details 
 'calc w=1/[\s^2^(Fo^2^)+(0.0450P)^2^+1.2654P] where P=(Fo^2^+2Fc^2^)/3' 
_atom_sites_solution_primary      direct 
_atom_sites_solution_secondary    difmap 
_atom_sites_solution_hydrogens    geom 
_refine_ls_hydrogen_treatment     mixed 
_refine_ls_extinction_method      SHELXL 
_refine_ls_extinction_coef        0.033(3) 
_refine_ls_extinction_expression 
 'Fc^*^=kFc[1+0.001xFc^2^\l^3^/sin(2\q)]^-1/4^' 
_refine_ls_number_reflns          4596 
_refine_ls_number_parameters      327 
_refine_ls_number_restraints      0 
_refine_ls_R_factor_all           0.0709 
_refine_ls_R_factor_gt            0.0595 
_refine_ls_wR_factor_ref          0.1506 
_refine_ls_wR_factor_gt           0.1419 
_refine_ls_goodness_of_fit_ref    1.006 
_refine_ls_restrained_S_all       1.006 
_refine_ls_shift/su_max           0.000 
_refine_ls_shift/su_mean          0.000 
 
loop_ 
 _atom_site_label 
 _atom_site_type_symbol 
 _atom_site_fract_x 
 _atom_site_fract_y 
 _atom_site_fract_z 
 _atom_site_U_iso_or_equiv 
 _atom_site_adp_type 
 _atom_site_occupancy 
 _atom_site_symmetry_multiplicity 
 _atom_site_calc_flag 
 _atom_site_refinement_flags 
 _atom_site_disorder_assembly 
 _atom_site_disorder_group 
S1 S 0.27016(8) 0.68882(7) 0.30093(7) 0.0644(3) Uani 1 1 d . . . 
O1 O 0.3592(2) 0.6673(2) 0.2263(2) 0.0936(8) Uani 1 1 d . . . 
O2 O 0.2576(2) 0.6158(2) 0.3873(2) 0.0886(8) Uani 1 1 d . . . 
N1 N 0.2883(2) 0.6928(2) -0.07753(16) 0.0467(5) Uani 1 1 d . . . 
N2 N 0.1004(2) 0.6654(2) 0.23848(17) 0.0505(5) Uani 1 1 d . . . 
C1 C 0.4065(3) 0.6324(3) -0.0446(2) 0.0530(7) Uani 1 1 d . . . 
H1A H 0.3783 0.5471 -0.0741 0.064 Uiso 1 1 calc R . . 
H1B H 0.4189 0.6299 0.0301 0.064 Uiso 1 1 calc R . . 
C2 C 0.5507(3) 0.6986(2) -0.07656(19) 0.0478(6) Uani 1 1 d . . . 
C3 C 0.6149(3) 0.8219(3) -0.0449(3) 0.0643(8) Uani 1 1 d . . . 
H3 H 0.5681 0.8649 -0.0039 0.077 Uiso 1 1 calc R . . 
C4 C 0.7487(4) 0.8825(3) -0.0737(3) 0.0831(11) Uani 1 1 d . . . 
H4 H 0.7915 0.9657 -0.0520 0.100 Uiso 1 1 calc R . . 
C5 C 0.8183(4) 0.8189(4) -0.1347(3) 0.0819(11) Uani 1 1 d . . . 
H5 H 0.9076 0.8594 -0.1547 0.098 Uiso 1 1 calc R . . 
C6 C 0.7558(4) 0.6973(4) -0.1653(3) 0.0754(10) Uani 1 1 d . . . 
H6 H 0.8027 0.6542 -0.2061 0.090 Uiso 1 1 calc R . . 
C7 C 0.6237(3) 0.6377(3) -0.1364(2) 0.0596(7) Uani 1 1 d . . . 
H7 H 0.5824 0.5541 -0.1578 0.072 Uiso 1 1 calc R . . 
C8 C 0.2446(3) 0.6789(2) -0.18948(19) 0.0501(6) Uani 1 1 d . . . 
H8A H 0.1715 0.6001 -0.2073 0.060 Uiso 1 1 calc R . . 
H8B H 0.3296 0.6759 -0.2223 0.060 Uiso 1 1 calc R . . 
C9 C 0.1820(3) 0.7827(2) -0.23193(19) 0.0465(6) Uani 1 1 d . . . 
C10 C 0.0787(3) 0.7611(3) -0.3205(2) 0.0626(8) Uani 1 1 d . . . 
H10 H 0.0436 0.6808 -0.3518 0.075 Uiso 1 1 calc R . . 
C11 C 0.0272(4) 0.8576(4) -0.3628(3) 0.0805(10) Uani 1 1 d . . . 
H11 H -0.0425 0.8416 -0.4220 0.097 Uiso 1 1 calc R . . 
C12 C 0.0780(4) 0.9768(4) -0.3181(3) 0.0815(11) Uani 1 1 d . . . 
H12 H 0.0439 1.0416 -0.3473 0.098 Uiso 1 1 calc R . . 
C13 C 0.1797(4) 0.9995(3) -0.2300(3) 0.0741(9) Uani 1 1 d . . . 
H13 H 0.2141 1.0799 -0.1988 0.089 Uiso 1 1 calc R . . 
C14 C 0.2309(3) 0.9032(3) -0.1877(2) 0.0588(7) Uani 1 1 d . . . 
H14 H 0.2999 0.9197 -0.1281 0.071 Uiso 1 1 calc R . . 
C15 C 0.1638(3) 0.6535(3) -0.0199(2) 0.0542(7) Uani 1 1 d . . . 
H15A H 0.1687 0.5764 0.0119 0.065 Uiso 1 1 calc R . . 
H15B H 0.0723 0.6375 -0.0674 0.065 Uiso 1 1 calc R . . 
C16 C 0.1651(4) 0.7511(3) 0.0620(3) 0.0712(9) Uani 1 1 d . . . 
H16A H 0.1408 0.8217 0.0284 0.085 Uiso 1 1 calc R . . 
H16B H 0.2644 0.7798 0.0989 0.085 Uiso 1 1 calc R . . 
C17 C 0.0621(3) 0.7110(2) 0.1394(2) 0.0541(7) Uani 1 1 d . . . 
C18 C -0.0801(3) 0.7101(3) 0.1281(2) 0.0565(7) Uani 1 1 d . . . 
H18 H -0.1324 0.7326 0.0697 0.068 Uiso 1 1 calc R . . 
C19 C -0.1392(3) 0.6698(2) 0.21866(19) 0.0439(6) Uani 1 1 d . . . 
C20 C -0.0273(3) 0.6446(2) 0.28865(18) 0.0423(5) Uani 1 1 d . . . 
C21 C -0.0526(3) 0.6025(3) 0.3849(2) 0.0601(7) Uani 1 1 d . . . 
H21 H 0.0225 0.5863 0.4316 0.072 Uiso 1 1 calc R . . 
C22 C -0.1927(4) 0.5854(3) 0.4090(2) 0.0698(9) Uani 1 1 d . . . 
H22 H -0.2121 0.5573 0.4732 0.084 Uiso 1 1 calc R . . 
C23 C -0.3057(3) 0.6088(3) 0.3405(3) 0.0671(8) Uani 1 1 d . . . 
H23 H -0.3995 0.5955 0.3589 0.081 Uiso 1 1 calc R . . 
C24 C -0.2804(3) 0.6513(3) 0.2457(2) 0.0562(7) Uani 1 1 d . . . 
H24 H -0.3562 0.6676 0.1999 0.067 Uiso 1 1 calc R . . 
C25 C 0.3218(3) 0.8475(3) 0.3427(2) 0.0525(7) Uani 1 1 d . . . 
C26 C 0.2707(3) 0.8887(3) 0.4274(2) 0.0637(8) Uani 1 1 d . . . 
H26 H 0.2127 0.8321 0.4655 0.076 Uiso 1 1 calc R . . 
C27 C 0.3067(3) 1.0151(3) 0.4552(2) 0.0680(8) Uani 1 1 d . . . 
H27 H 0.2722 1.0425 0.5126 0.082 Uiso 1 1 calc R . . 
C28 C 0.3918(3) 1.1016(3) 0.4004(2) 0.0612(8) Uani 1 1 d . . . 
C29 C 0.4436(4) 1.0576(3) 0.3176(2) 0.0753(9) Uani 1 1 d . . . 
H29 H 0.5028 1.1139 0.2801 0.090 Uiso 1 1 calc R . . 
C30 C 0.4101(3) 0.9319(3) 0.2887(2) 0.0702(9) Uani 1 1 d . . . 
H30 H 0.4474 0.9044 0.2326 0.084 Uiso 1 1 calc R . . 
C31 C 0.4259(5) 1.2391(3) 0.4288(3) 0.0928(12) Uani 1 1 d . . . 
H31A H 0.3542 1.2739 0.3896 0.139 Uiso 1 1 calc R . . 
H31B H 0.5222 1.2790 0.4136 0.139 Uiso 1 1 calc R . . 
H31C H 0.4230 1.2523 0.5012 0.139 Uiso 1 1 calc R . . 
 
loop_ 
 _atom_site_aniso_label 
 _atom_site_aniso_U_11 
 _atom_site_aniso_U_22 
 _atom_site_aniso_U_33 
 _atom_site_aniso_U_23 
 _atom_site_aniso_U_13 
 _atom_site_aniso_U_12 
S1 0.0426(4) 0.0625(5) 0.0909(6) 0.0022(4) 0.0066(4) 0.0206(3) 
O1 0.0545(13) 0.0906(17) 0.145(2) -0.0245(16) 0.0325(14) 0.0303(12) 
O2 0.0619(14) 0.0816(16) 0.117(2) 0.0262(15) -0.0158(13) 0.0216(12) 
N1 0.0465(12) 0.0524(13) 0.0433(11) 0.0003(9) 0.0109(9) 0.0143(10) 
N2 0.0409(12) 0.0525(13) 0.0593(13) 0.0005(10) 0.0112(10) 0.0123(10) 
C1 0.0547(16) 0.0553(16) 0.0522(15) 0.0079(12) 0.0112(12) 0.0179(13) 
C2 0.0461(14) 0.0537(16) 0.0458(14) 0.0101(11) 0.0043(11) 0.0172(12) 
C3 0.0573(18) 0.0576(18) 0.077(2) 0.0025(15) 0.0055(15) 0.0148(14) 
C4 0.068(2) 0.060(2) 0.107(3) 0.0208(19) -0.010(2) 0.0010(17) 
C5 0.0498(18) 0.113(3) 0.084(2) 0.041(2) 0.0171(17) 0.016(2) 
C6 0.0589(19) 0.114(3) 0.0608(19) 0.0120(19) 0.0177(15) 0.030(2) 
C7 0.0570(17) 0.0715(19) 0.0534(16) 0.0017(14) 0.0076(13) 0.0225(14) 
C8 0.0533(15) 0.0507(15) 0.0479(14) -0.0048(11) 0.0099(12) 0.0158(12) 
C9 0.0430(13) 0.0528(15) 0.0467(14) 0.0028(11) 0.0158(11) 0.0132(11) 
C10 0.0635(18) 0.073(2) 0.0526(16) -0.0016(14) 0.0071(14) 0.0218(15) 
C11 0.077(2) 0.114(3) 0.061(2) 0.019(2) 0.0068(16) 0.045(2) 
C12 0.092(3) 0.089(3) 0.088(3) 0.036(2) 0.034(2) 0.052(2) 
C13 0.080(2) 0.0543(19) 0.097(3) 0.0146(17) 0.030(2) 0.0243(16) 
C14 0.0562(17) 0.0514(17) 0.0687(18) 0.0009(14) 0.0116(14) 0.0126(13) 
C15 0.0467(15) 0.0608(17) 0.0524(15) -0.0051(12) 0.0102(12) 0.0081(12) 
C16 0.084(2) 0.0595(19) 0.071(2) -0.0039(15) 0.0371(17) 0.0071(16) 
C17 0.0666(18) 0.0484(15) 0.0459(14) -0.0043(11) 0.0182(13) 0.0075(13) 
C18 0.0634(18) 0.0595(17) 0.0459(15) 0.0048(12) 0.0050(13) 0.0156(14) 
C19 0.0479(14) 0.0400(13) 0.0436(13) -0.0037(10) 0.0046(11) 0.0125(11) 
C20 0.0422(13) 0.0417(13) 0.0425(13) -0.0007(10) 0.0069(10) 0.0100(10) 
C21 0.0610(18) 0.0686(19) 0.0482(15) 0.0077(13) 0.0036(13) 0.0138(14) 
C22 0.075(2) 0.081(2) 0.0508(17) 0.0026(15) 0.0246(15) 0.0069(17) 
C23 0.0539(17) 0.075(2) 0.073(2) -0.0112(16) 0.0247(15) 0.0101(15) 
C24 0.0454(15) 0.0557(16) 0.0678(18) -0.0083(13) 0.0034(13) 0.0172(12) 
C25 0.0357(13) 0.0657(17) 0.0549(15) -0.0024(13) 0.0035(11) 0.0130(12) 
C26 0.0537(17) 0.077(2) 0.0630(18) 0.0096(15) 0.0162(14) 0.0165(15) 
C27 0.0618(19) 0.093(2) 0.0545(17) -0.0087(16) 0.0104(14) 0.0292(17) 
C28 0.0574(17) 0.0701(19) 0.0506(16) -0.0069(14) -0.0086(13) 0.0164(15) 
C29 0.078(2) 0.073(2) 0.0588(19) -0.0070(16) 0.0139(16) -0.0116(17) 
C30 0.0608(18) 0.080(2) 0.0598(18) -0.0161(16) 0.0212(15) -0.0037(16) 
C31 0.107(3) 0.076(2) 0.085(3) -0.0188(19) -0.017(2) 0.024(2) 
 
_geom_special_details 
; 
 All esds (except the esd in the dihedral angle between two l.s. planes) 
 are estimated using the full covariance matrix.  The cell esds are taken 
 into account individually in the estimation of esds in distances, angles 
 and torsion angles; correlations between esds in cell parameters are only 
 used when they are defined by crystal symmetry.  An approximate (isotropic) 
 treatment of cell esds is used for estimating esds involving l.s. planes. 
; 
 
loop_ 
 _geom_bond_atom_site_label_1 
 _geom_bond_atom_site_label_2 
 _geom_bond_distance 
 _geom_bond_site_symmetry_2 
 _geom_bond_publ_flag 
S1 O2 1.410(3) . ? 
S1 O1 1.425(2) . ? 
S1 N2 1.659(2) . ? 
S1 C25 1.754(3) . ? 
N1 C8 1.460(3) . ? 
N1 C1 1.467(3) . ? 
N1 C15 1.467(3) . ? 
N2 C20 1.425(3) . ? 
N2 C17 1.439(3) . ? 
C1 C2 1.501(4) . ? 
C1 H1A 0.9700 . ? 
C1 H1B 0.9700 . ? 
C2 C7 1.377(4) . ? 
C2 C3 1.377(4) . ? 
C3 C4 1.385(5) . ? 
C3 H3 0.9300 . ? 
C4 C5 1.382(5) . ? 
C4 H4 0.9300 . ? 
C5 C6 1.355(5) . ? 
C5 H5 0.9300 . ? 
C6 C7 1.370(4) . ? 
C6 H6 0.9300 . ? 
C7 H7 0.9300 . ? 
C8 C9 1.508(4) . ? 
C8 H8A 0.9700 . ? 
C8 H8B 0.9700 . ? 
C9 C14 1.381(4) . ? 
C9 C10 1.386(4) . ? 
C10 C11 1.383(5) . ? 
C10 H10 0.9300 . ? 
C11 C12 1.371(5) . ? 
C11 H11 0.9300 . ? 
C12 C13 1.373(5) . ? 
C12 H12 0.9300 . ? 
C13 C14 1.379(4) . ? 
C13 H13 0.9300 . ? 
C14 H14 0.9300 . ? 
C15 C16 1.497(4) . ? 
C15 H15A 0.9700 . ? 
C15 H15B 0.9700 . ? 
C16 C17 1.501(4) . ? 
C16 H16A 0.9700 . ? 
C16 H16B 0.9700 . ? 
C17 C18 1.334(4) . ? 
C18 C19 1.415(4) . ? 
C18 H18 0.9300 . ? 
C19 C20 1.394(3) . ? 
C19 C24 1.398(4) . ? 
C20 C21 1.387(4) . ? 
C21 C22 1.375(4) . ? 
C21 H21 0.9300 . ? 
C22 C23 1.382(5) . ? 
C22 H22 0.9300 . ? 
C23 C24 1.369(4) . ? 
C23 H23 0.9300 . ? 
C24 H24 0.9300 . ? 
C25 C30 1.373(4) . ? 
C25 C26 1.376(4) . ? 
C26 C27 1.383(4) . ? 
C26 H26 0.9300 . ? 
C27 C28 1.376(5) . ? 
C27 H27 0.9300 . ? 
C28 C29 1.372(4) . ? 
C28 C31 1.502(4) . ? 
C29 C30 1.379(5) . ? 
C29 H29 0.9300 . ? 
C30 H30 0.9300 . ? 
C31 H31A 0.9600 . ? 
C31 H31B 0.9600 . ? 
C31 H31C 0.9600 . ? 
 
loop_ 
 _geom_angle_atom_site_label_1 
 _geom_angle_atom_site_label_2 
 _geom_angle_atom_site_label_3 
 _geom_angle 
 _geom_angle_site_symmetry_1 
 _geom_angle_site_symmetry_3 
 _geom_angle_publ_flag 
O2 S1 O1 120.05(17) . . ? 
O2 S1 N2 105.69(13) . . ? 
O1 S1 N2 106.53(14) . . ? 
O2 S1 C25 109.51(15) . . ? 
O1 S1 C25 109.24(15) . . ? 
N2 S1 C25 104.66(12) . . ? 
C8 N1 C1 112.0(2) . . ? 
C8 N1 C15 113.2(2) . . ? 
C1 N1 C15 112.0(2) . . ? 
C20 N2 C17 106.8(2) . . ? 
C20 N2 S1 123.63(18) . . ? 
C17 N2 S1 125.12(18) . . ? 
N1 C1 C2 112.7(2) . . ? 
N1 C1 H1A 109.1 . . ? 
C2 C1 H1A 109.1 . . ? 
N1 C1 H1B 109.1 . . ? 
C2 C1 H1B 109.1 . . ? 
H1A C1 H1B 107.8 . . ? 
C7 C2 C3 118.1(3) . . ? 
C7 C2 C1 121.3(3) . . ? 
C3 C2 C1 120.6(3) . . ? 
C2 C3 C4 120.5(3) . . ? 
C2 C3 H3 119.8 . . ? 
C4 C3 H3 119.8 . . ? 
C5 C4 C3 119.9(3) . . ? 
C5 C4 H4 120.1 . . ? 
C3 C4 H4 120.1 . . ? 
C6 C5 C4 119.7(3) . . ? 
C6 C5 H5 120.1 . . ? 
C4 C5 H5 120.1 . . ? 
C5 C6 C7 120.2(3) . . ? 
C5 C6 H6 119.9 . . ? 
C7 C6 H6 119.9 . . ? 
C6 C7 C2 121.6(3) . . ? 
C6 C7 H7 119.2 . . ? 
C2 C7 H7 119.2 . . ? 
N1 C8 C9 113.5(2) . . ? 
N1 C8 H8A 108.9 . . ? 
C9 C8 H8A 108.9 . . ? 
N1 C8 H8B 108.9 . . ? 
C9 C8 H8B 108.9 . . ? 
H8A C8 H8B 107.7 . . ? 
C14 C9 C10 117.8(3) . . ? 
C14 C9 C8 121.5(2) . . ? 
C10 C9 C8 120.6(2) . . ? 
C11 C10 C9 120.7(3) . . ? 
C11 C10 H10 119.7 . . ? 
C9 C10 H10 119.7 . . ? 
C12 C11 C10 120.6(3) . . ? 
C12 C11 H11 119.7 . . ? 
C10 C11 H11 119.7 . . ? 
C11 C12 C13 119.4(3) . . ? 
C11 C12 H12 120.3 . . ? 
C13 C12 H12 120.3 . . ? 
C12 C13 C14 120.0(3) . . ? 
C12 C13 H13 120.0 . . ? 
C14 C13 H13 120.0 . . ? 
C13 C14 C9 121.5(3) . . ? 
C13 C14 H14 119.2 . . ? 
C9 C14 H14 119.2 . . ? 
N1 C15 C16 111.3(2) . . ? 
N1 C15 H15A 109.4 . . ? 
C16 C15 H15A 109.4 . . ? 
N1 C15 H15B 109.4 . . ? 
C16 C15 H15B 109.4 . . ? 
H15A C15 H15B 108.0 . . ? 
C15 C16 C17 115.7(3) . . ? 
C15 C16 H16A 108.3 . . ? 
C17 C16 H16A 108.3 . . ? 
C15 C16 H16B 108.3 . . ? 
C17 C16 H16B 108.3 . . ? 
H16A C16 H16B 107.4 . . ? 
C18 C17 N2 108.3(2) . . ? 
C18 C17 C16 126.2(3) . . ? 
N2 C17 C16 125.5(3) . . ? 
C17 C18 C19 109.7(2) . . ? 
C17 C18 H18 125.2 . . ? 
C19 C18 H18 125.2 . . ? 
C20 C19 C24 119.3(2) . . ? 
C20 C19 C18 108.2(2) . . ? 
C24 C19 C18 132.5(3) . . ? 
C21 C20 C19 121.5(2) . . ? 
C21 C20 N2 131.7(2) . . ? 
C19 C20 N2 106.8(2) . . ? 
C22 C21 C20 117.6(3) . . ? 
C22 C21 H21 121.2 . . ? 
C20 C21 H21 121.2 . . ? 
C21 C22 C23 121.9(3) . . ? 
C21 C22 H22 119.1 . . ? 
C23 C22 H22 119.1 . . ? 
C24 C23 C22 120.4(3) . . ? 
C24 C23 H23 119.8 . . ? 
C22 C23 H23 119.8 . . ? 
C23 C24 C19 119.2(3) . . ? 
C23 C24 H24 120.4 . . ? 
C19 C24 H24 120.4 . . ? 
C30 C25 C26 119.6(3) . . ? 
C30 C25 S1 119.8(2) . . ? 
C26 C25 S1 120.5(2) . . ? 
C25 C26 C27 119.3(3) . . ? 
C25 C26 H26 120.4 . . ? 
C27 C26 H26 120.4 . . ? 
C28 C27 C26 122.0(3) . . ? 
C28 C27 H27 119.0 . . ? 
C26 C27 H27 119.0 . . ? 
C29 C28 C27 117.4(3) . . ? 
C29 C28 C31 120.9(3) . . ? 
C27 C28 C31 121.7(3) . . ? 
C28 C29 C30 121.7(3) . . ? 
C28 C29 H29 119.1 . . ? 
C30 C29 H29 119.1 . . ? 
C25 C30 C29 119.9(3) . . ? 
C25 C30 H30 120.0 . . ? 
C29 C30 H30 120.0 . . ? 
C28 C31 H31A 109.5 . . ? 
C28 C31 H31B 109.5 . . ? 
H31A C31 H31B 109.5 . . ? 
C28 C31 H31C 109.5 . . ? 
H31A C31 H31C 109.5 . . ? 
H31B C31 H31C 109.5 . . ? 
 
loop_ 
 _geom_torsion_atom_site_label_1 
 _geom_torsion_atom_site_label_2 
 _geom_torsion_atom_site_label_3 
 _geom_torsion_atom_site_label_4 
 _geom_torsion 
 _geom_torsion_site_symmetry_1 
 _geom_torsion_site_symmetry_2 
 _geom_torsion_site_symmetry_3 
 _geom_torsion_site_symmetry_4 
 _geom_torsion_publ_flag 
O2 S1 N2 C20 33.7(2) . . . . ? 
O1 S1 N2 C20 162.5(2) . . . . ? 
C25 S1 N2 C20 -81.9(2) . . . . ? 
O2 S1 N2 C17 -173.1(2) . . . . ? 
O1 S1 N2 C17 -44.3(3) . . . . ? 
C25 S1 N2 C17 71.3(2) . . . . ? 
C8 N1 C1 C2 69.6(3) . . . . ? 
C15 N1 C1 C2 -162.0(2) . . . . ? 
N1 C1 C2 C7 -122.7(3) . . . . ? 
N1 C1 C2 C3 58.5(3) . . . . ? 
C7 C2 C3 C4 0.5(4) . . . . ? 
C1 C2 C3 C4 179.4(3) . . . . ? 
C2 C3 C4 C5 0.1(5) . . . . ? 
C3 C4 C5 C6 -0.6(5) . . . . ? 
C4 C5 C6 C7 0.4(5) . . . . ? 
C5 C6 C7 C2 0.3(5) . . . . ? 
C3 C2 C7 C6 -0.7(4) . . . . ? 
C1 C2 C7 C6 -179.6(3) . . . . ? 
C1 N1 C8 C9 -152.7(2) . . . . ? 
C15 N1 C8 C9 79.6(3) . . . . ? 
N1 C8 C9 C14 32.8(3) . . . . ? 
N1 C8 C9 C10 -150.8(2) . . . . ? 
C14 C9 C10 C11 0.2(4) . . . . ? 
C8 C9 C10 C11 -176.4(3) . . . . ? 
C9 C10 C11 C12 0.3(5) . . . . ? 
C10 C11 C12 C13 -0.7(5) . . . . ? 
C11 C12 C13 C14 0.6(5) . . . . ? 
C12 C13 C14 C9 -0.1(5) . . . . ? 
C10 C9 C14 C13 -0.3(4) . . . . ? 
C8 C9 C14 C13 176.3(3) . . . . ? 
C8 N1 C15 C16 -130.0(3) . . . . ? 
C1 N1 C15 C16 102.3(3) . . . . ? 
N1 C15 C16 C17 -168.0(3) . . . . ? 
C20 N2 C17 C18 -3.6(3) . . . . ? 
S1 N2 C17 C18 -160.5(2) . . . . ? 
C20 N2 C17 C16 177.0(2) . . . . ? 
S1 N2 C17 C16 20.1(4) . . . . ? 
C15 C16 C17 C18 -84.7(4) . . . . ? 
C15 C16 C17 N2 94.6(4) . . . . ? 
N2 C17 C18 C19 2.3(3) . . . . ? 
C16 C17 C18 C19 -178.3(3) . . . . ? 
C17 C18 C19 C20 -0.1(3) . . . . ? 
C17 C18 C19 C24 -179.1(3) . . . . ? 
C24 C19 C20 C21 -0.5(4) . . . . ? 
C18 C19 C20 C21 -179.7(2) . . . . ? 
C24 C19 C20 N2 177.0(2) . . . . ? 
C18 C19 C20 N2 -2.2(3) . . . . ? 
C17 N2 C20 C21 -179.4(3) . . . . ? 
S1 N2 C20 C21 -22.0(4) . . . . ? 
C17 N2 C20 C19 3.5(3) . . . . ? 
S1 N2 C20 C19 160.86(18) . . . . ? 
C19 C20 C21 C22 0.4(4) . . . . ? 
N2 C20 C21 C22 -176.3(3) . . . . ? 
C20 C21 C22 C23 0.1(5) . . . . ? 
C21 C22 C23 C24 -0.6(5) . . . . ? 
C22 C23 C24 C19 0.5(4) . . . . ? 
C20 C19 C24 C23 0.0(4) . . . . ? 
C18 C19 C24 C23 179.0(3) . . . . ? 
O2 S1 C25 C30 146.8(2) . . . . ? 
O1 S1 C25 C30 13.4(3) . . . . ? 
N2 S1 C25 C30 -100.3(3) . . . . ? 
O2 S1 C25 C26 -35.2(3) . . . . ? 
O1 S1 C25 C26 -168.6(2) . . . . ? 
N2 S1 C25 C26 77.7(2) . . . . ? 
C30 C25 C26 C27 1.5(4) . . . . ? 
S1 C25 C26 C27 -176.5(2) . . . . ? 
C25 C26 C27 C28 0.2(5) . . . . ? 
C26 C27 C28 C29 -1.5(5) . . . . ? 
C26 C27 C28 C31 177.8(3) . . . . ? 
C27 C28 C29 C30 1.1(5) . . . . ? 
C31 C28 C29 C30 -178.2(3) . . . . ? 
C26 C25 C30 C29 -1.9(5) . . . . ? 
S1 C25 C30 C29 176.1(3) . . . . ? 
C28 C29 C30 C25 0.6(5) . . . . ? 
 
_diffrn_measured_fraction_theta_max    0.992 
_diffrn_reflns_theta_full              25.00 
_diffrn_measured_fraction_theta_full   0.992 
_refine_diff_density_max    0.487 
_refine_diff_density_min   -0.694 
_refine_diff_density_rms    0.051 
